# Supplementary material for: Muscle‐derived exophers promote reproductive fitness
Source: PubMed Central journal article supplement (PMC8339713; doi:10.15252/embr.202052071), 2021-07-20
Supplement: EMBR-22-e52071-s003.pdf [file EMBR-22-e52071-s003.pdf]

## Appendix

|                                                                                   |   |
|-----------------------------------------------------------------------------------|---|
| Appendix Table S1. Percentage of animals with exophers. ....                      | 2 |
| Appendix Table S2. List of all <i>C. elegans</i> strains used in this study. .... | 4 |
| Appendix Table S3. List of all oligonucleotides strains used in this study. ....  | 5 |

Appendix Table S1. Percentage of animals with exophers.

| Figure number | Condition            | Percentage of animals with exophers |
|---------------|----------------------|-------------------------------------|
| Figure 1F     | Control              | 100%                                |
| Figure 1H     | Control              | 97%                                 |
|               | <i>atg-7</i> RNAi    | 89%                                 |
|               | <i>lgg-1</i> RNAi    | 95%                                 |
| Figure 1I     | Control              | 93%                                 |
|               | <i>hsf-1</i> RNAi    | 93%                                 |
| Figure 1J     | Oxidative stress +   | 97%                                 |
|               | Oxidative stress -   | 100%                                |
|               | Heat stress +        | 97%                                 |
|               | Heat stress -        | 90%                                 |
| Figure 2A     | Hermaphrodite day 0  | 0%                                  |
|               | Hermaphrodite day 1  | 69%                                 |
|               | Hermaphrodite day 2  | 98%                                 |
|               | Hermaphrodite day 3  | 92%                                 |
|               | Hermaphrodite day 4  | 84%                                 |
|               | Hermaphrodite day 5  | 79%                                 |
|               | Hermaphrodite day 6  | 78%                                 |
|               | Hermaphrodite day 7  | 72%                                 |
|               | Hermaphrodite day 8  | 73%                                 |
|               | Hermaphrodite day 9  | 74%                                 |
|               | Hermaphrodite day 10 | 84%                                 |
|               | Hermaphrodite day 11 | 78%                                 |
|               | Hermaphrodite day 12 | 82%                                 |
|               | Hermaphrodite day 13 | 93%                                 |
|               | Hermaphrodite day 14 | 86%                                 |
|               | Hermaphrodite day 15 | 88%                                 |
|               | Male day 0           | 0%                                  |
|               | Male day 1           | 1%                                  |
|               | Male day 2           | 5%                                  |
|               | Male day 3           | 7%                                  |
|               | Male day 4           | 33%                                 |
|               | Male day 5           | 31%                                 |
|               | Male day 6           | 32%                                 |
|               | Male day 7           | 35%                                 |
|               | Male day 8           | 36%                                 |
|               | Male day 9           | 58%                                 |
|               | Male day 10          | 64%                                 |
|               | Male day 11          | 55%                                 |
|               | Male day 12          | 62%                                 |
|               | Male day 13          | 54%                                 |
|               | Male day 14          | 58%                                 |
|               | Male day 15          | 70%                                 |

|            |                           |      |
|------------|---------------------------|------|
| Figure 2B  | 15°C without offspring    | 40%  |
|            | 15°C with offspring       | 79%  |
|            | 25°C without offspring    | 42%  |
|            | 25°C with offspring       | 100% |
| Figure 2D  | Control                   | 95%  |
|            | FUdR                      | 15%  |
| Figure 3A  | Control                   | 89%  |
| Figure 3B  | Control                   | 93%  |
|            | <i>goa-1</i> RNAi         | 87%  |
|            | <i>egl-1</i> RNAi         | 98%  |
|            | <i>egl-4</i> RNAi         | 98%  |
| Figure 3C  | Control L4 → AD1          | 26%  |
|            | Starved L4 → AD1          | 16%  |
|            | Control AD2 → AD3         | 80%  |
|            | Starved AD2 → AD3         | 98%  |
| Figure 3E  | Control                   | 94%  |
|            | Embryo-conditioned buffer | 95%  |
| Figure 3F  | Control                   | 96%  |
|            | <i>emb-27</i> RNAi        | 93%  |
| Figure 4E  | Control                   | 90%  |
|            | <i>vit-2</i> RNAi         | 100% |
| Figure 4G  | Control                   | 98%  |
|            | <i>rme-2</i> RNAi         | 34%  |
| Figure S1B | Control                   | 96%  |
|            | <i>emb-8</i> RNAi         | 93%  |
|            | <i>pod-1</i> RNAi         | 89%  |
| Figure S2A | Control (H)               | 95%  |
|            | Embryos lysate (H)        | 100% |
|            | Larvae lysate (H)         | 100% |
|            | Control (M)               | 9%   |
|            | Embryos lysate (M)        | 6%   |
| Figure S2B | Control                   | 97%  |
|            | <i>egl-1</i> RNAi         | 98%  |
|            | Control + FUdR            | 33%  |
|            | <i>egl-1</i> RNAi + FUdR  | 29%  |
| Figure S2D | Control                   | 100% |
|            | <i>unc-45</i> RNAi        | 71%  |
|            | Control                   | 93%  |
|            | <i>unc-54</i> RNAi        | 98%  |
| Figure S4A | Control                   | 96%  |
|            | <i>ced-1</i> RNAi         | 99%  |
|            | <i>ced-6</i> RNAi         | 96%  |

Appendix Table S2. List of all *C. elegans* strains used in this study.

| Strain | Genotype                                                                                                                                                                                                                        | Usage                                                                                                                                       | Reference                      |
|--------|---------------------------------------------------------------------------------------------------------------------------------------------------------------------------------------------------------------------------------|---------------------------------------------------------------------------------------------------------------------------------------------|--------------------------------|
| N2     | Wild type                                                                                                                                                                                                                       | Figure 3E                                                                                                                                   | Brenner 1974                   |
| ACH91  | <i>wacIs6[myo-3p::pas-7::GGGGS Linker-wrmScarlet::unc-54 3'UTR, unc-119(+)]</i> , <i>wacIs14[myo-3p::tomm-20_1-50aa::attB5::mGFP::unc-54-3'UTR, unc-119(+)]</i>                                                                 | Figure 1A, J;<br>Figure 4E<br>Figure S2D                                                                                                    | Generated for this study       |
| ACH93  | <i>wacIs1[myo-3 promoter::rpn-5 CAI=0.97::GGGGS Linker-wrmScarlet::unc-54 3'UTR, unc-119(+)]</i> , <i>wacIs14[myo-3 promoter::tomm-20_1-50aa::attB5::mGFP::unc-54-3'UTR, unc-119(+)]</i>                                        | Figure 1A-B, E-I;<br>Figure 2A, D-E;<br>Figure 3A-C, E-F;<br>Figure 4B-D, G, I;<br>Figure S1A-B;<br>Figure S2A-C<br>Figure S3<br>Figure S4A | Generated for this study       |
| ACH199 | <i>wacIs1[myo-3 promoter::rpn-5 CAI=0.97::GGGGS Linker-wrmScarlet::unc-54 3'UTR, unc-119(+)]</i> , <i>vit-2(crg9070[vit-2::gfp]) X</i>                                                                                          | Figure 1C,<br>Figure 4F,H;<br>Figure S1C-D<br>Figure S4B-C                                                                                  | Generated for this study       |
| AGD885 | <i>rrf-3(b26) II; fem-1(hc17) IV; uthEx633 [myo-3p::GFP]</i>                                                                                                                                                                    | Figure 2B-C                                                                                                                                 | Vilchez et al. 2012            |
| TUR5   | <i>wacIs1[myo-3 promoter::rpn-5 CAI=0.97::GGGGS Linker-wrmScarlet::unc-54 3'UTR, unc-119(+)]</i> , <i>wacIs14[myo-3 promoter::tomm-20_1-50aa::attB5::mGFP::unc-54-3'UTR, unc-119(+)]</i> , <i>wwaEx2[unc-122 promoter::GFP]</i> | Figure 1D                                                                                                                                   | Generated for this study       |
| CB4088 | <i>him-5(e1490)V</i>                                                                                                                                                                                                            | Figure 2B                                                                                                                                   | Caenorhabditis Genetics Centre |

Appendix Table S3. List of all oligonucleotides strains used in this study.

| OLIGONUCLEOTIDE                                                                                     | SOURCE        | IDENTIFIER |
|-----------------------------------------------------------------------------------------------------|---------------|------------|
| MT38_pCG150trimmed_Fwd_3UTRunc-54<br>5'-AACTGTTTATAATTCAGTGGCCGTCGTTTTAC-3'                         | Sigma-Aldrich | N/A        |
| MT47_3UTRunc-54_Rev_pCG150trimmed<br>5'-TGAATTATAAACAGTTATGTTTGGTATATTGG-3'                         | Sigma-Aldrich | N/A        |
| MT39_pCG150trimmed_Rev_myo-3prom<br>5'-TAATCACTATAGCTTGGCGTAATCATGGTCAT-3'                          | Sigma-Aldrich | N/A        |
| MT40_myo-3prom_Fwd_pCG150trimmed<br>5'-CAAGCTATAGTGATTATAGTCTCTGTTTTTCGT-3'                         | Sigma-Aldrich | N/A        |
| MT62_tomm-20_Fwd_myo-3prom<br>5'-atccatctagaaGTTaaaaATGTCAGATAACCATTCTCGGA-3'                       | Sigma-Aldrich | N/A        |
| MT63_tomm-20_Rev_GFP<br>5'-CCCTTGGATTCAACTTTTGTATACAAAGTTGTGGC-3'                                   | Sigma-Aldrich | N/A        |
| MT64_GFP_fwd_tomm-20<br>5'-AAGTTGAATCCAAGGGAGAGGAGCTC-3'                                            | Sigma-Aldrich | N/A        |
| MT65_GFP_Rev_unc-54-3UTR<br>5'-gagtaattggacGTTTTACTTGTAGAGCTCGTCCATTC-3'                            | Sigma-Aldrich | N/A        |
| MT66_rpn-5 Fwd myo-3<br>5'-atccatctagaaGTTaaaaATGGCAGACAGACGC-3'                                    | Sigma-Aldrich | N/A        |
| MT76_rpn-5_rev_OL-wrmScarlet<br>5'-GGATCCACCACCTCCGGCACGTGGGGCG-3'                                  | Sigma-Aldrich | N/A        |
| MT74_OL-wrmScarlet_fwd 5'-<br>GGAGGTGGTGGATCCGGAGGTGGTGGATCCGGAGGAGGAGGATC<br>Cgtcagcaagggagaggc-3' | Sigma-Aldrich | N/A        |
| MT69_wrmScarlet Rev unc-54<br>5'-gagtaattggacGTTTTACTTGTAGAGCTCGTCCATTC-3'                          | Sigma-Aldrich | N/A        |
| MT72_pas-7_fwd_myo-3_prom<br>5'-atccatctagaaGTTatgagttcaatcggtaccgg-3'                              | Sigma-Aldrich | N/A        |
| MT73_pas-7_rev_OL-wrmScarlet<br>5'-GGATCCACCACCTCCTcaactttgtatacaaagttgtatcgtc-3'                   | Sigma-Aldrich | N/A        |
